# Supplementary material for: Inhibition of Lipolysis in the Novel Transgenic Quail Model Overexpressing G0/G1 Switch Gene 2 in the Adipose Tissue during Feed Restriction
Source: PLOS journal article supplement (doi:10.1371/journal.pone.0100905), 2014-06-25
Supplement: S1 (10.1371/journal.pone.0100905.s001) [file journal.pone.0100905.s001]

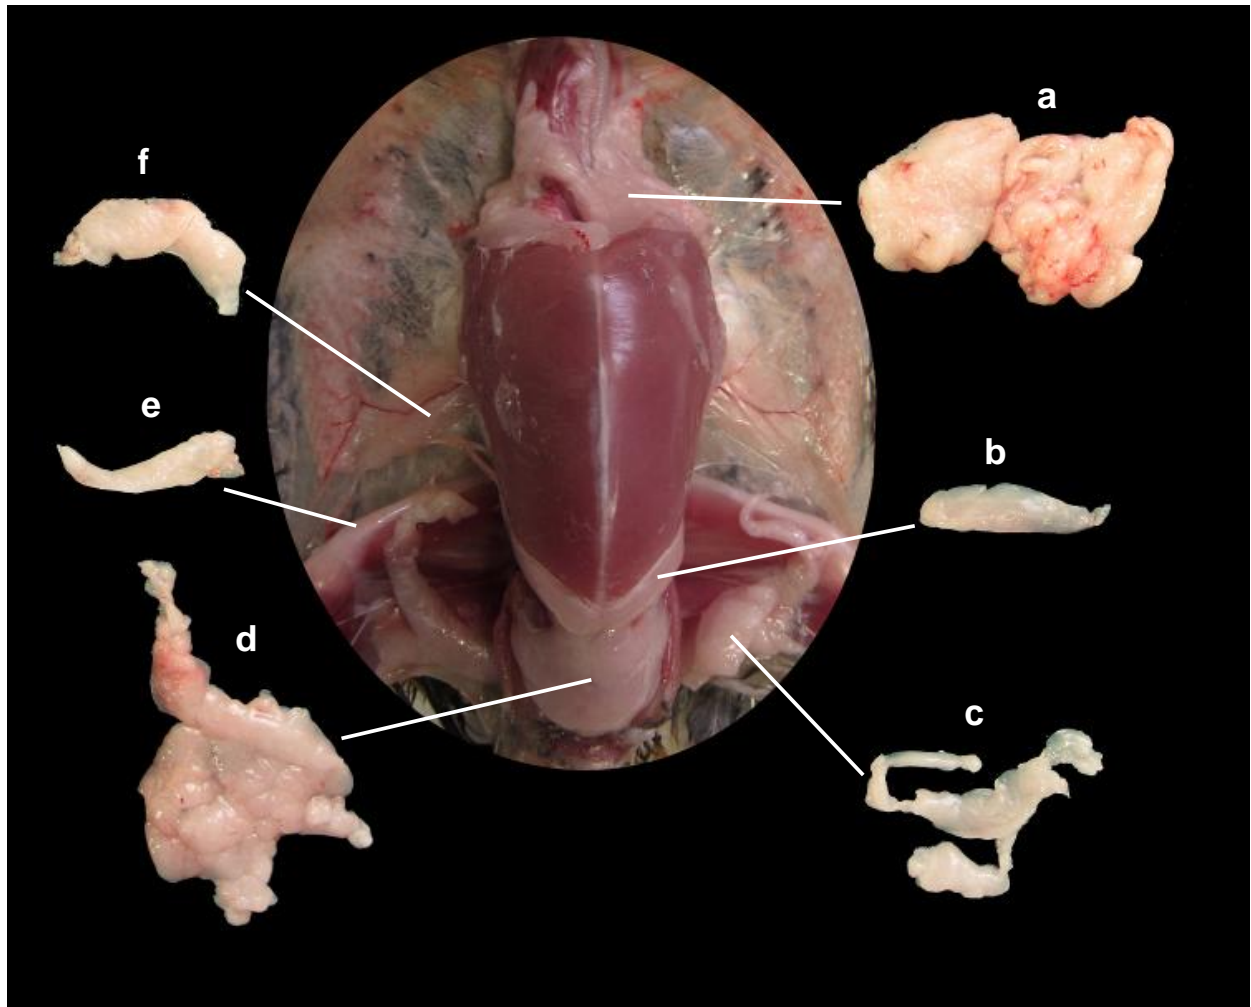

**Figure S1. Fat pads of quail.** Quail has lots of subcutaneous fats around the neck (a), breast muscle (b and f), and legs (c and e). A big fat pad is located in the abdomen (d). Two major fat pads, subcutaneous fat around the neck (a) and abdominal fat (d), were used for measuring the parameters.
