# Supplementary material for: Inhibition of Lipolysis in the Novel Transgenic Quail Model Overexpressing G0/G1 Switch Gene 2 in the Adipose Tissue during Feed Restriction
Source: PLOS journal article supplement (doi:10.1371/journal.pone.0100905), 2014-06-25
Supplement: S4 (10.1371/journal.pone.0100905.s004) [file journal.pone.0100905.s004]

**Table S1. The results of testcross for generating transgenic quail.**

| G0 Founder quail |           | F1 offspring  |                             | The ID of transgenic quail (sex) <sup>b</sup> |
|------------------|-----------|---------------|-----------------------------|-----------------------------------------------|
| Male             | Female    | Total hatched | Transgenic (%) <sup>a</sup> |                                               |
| 2706             | Wild type | 77            | 1 (1.3)                     | FG1 (F)                                       |
| 2712             | Wild type | 150           | 2 (1.3)                     | FG2 (F)                                       |
|                  |           |               |                             | FG6 (F)                                       |
| 2726             | 2727      | 114           | 2 (1.8)                     | FG3 (M)                                       |
|                  |           |               |                             | FG5 (F)                                       |
| Wild type        | 2702      | 145           | 1 (0.7)                     | FG4 (F)                                       |

<sup>a</sup>The percentage of F1 transgenic offspring among the total hatched chicks is designated in parentheses. <sup>b</sup>The letters in parentheses mean M for male and F for female.
